# Supplementary material
Source: publisher site journal article supplement (https://www.dovepress.com/article/370930)
Supplement: Supplementary file 1 [file get_supplementary_file.php]

**
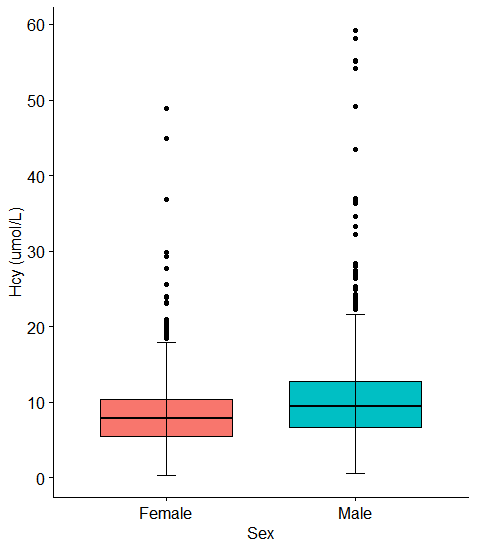
**

**Figure S1** The distribution of Hcy among older adults by gender.

**Note:** The lines in the middle of the box indicate the median. The lower and upper lines of the box indicate the 25th and 75th percentiles. The bottom and top of vertical lines across the box indicate the 5th and 95th percentiles. The scatters out of the box denote the outliers.

**Abbreviations:** Hcy, homocysteine.
